# Supplementary material for: Seasonal and spatial patterns of primary production in a high-latitude fjord affected by Greenland Ice Sheet run-off
Source: Copernicus journal article supplement (doi:10.5194/bg-16-3777-2019), 2019-10-02

Supplement of Biogeosciences, 16, 3777–3792, 2019  
<https://doi.org/10.5194/bg-16-3777-2019-supplement>  
© Author(s) 2019. This work is distributed under  
the Creative Commons Attribution 4.0 License.

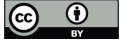

*Supplement of*

## **Seasonal and spatial patterns of primary production in a high-latitude fjord affected by Greenland Ice Sheet run-off**

**Johnna M. Holding et al.**

*Correspondence to:* Johnna M. Holding ([johnna@bios.au.dk](mailto:johnna@bios.au.dk))

The copyright of individual parts of the supplement might differ from the CC BY 4.0 License.

Supplementary Material for:

“Seasonal and spatial patterns of primary production in a high-latitude fjord affected by Greenland Ice Sheet run-off”- J.M. Holding et al.

**Table S1.** Photosynthetic parameters for each PI curve performed. PI curves were performed on each sampling day at 2 – 3 depths per station (surface and depth(s) of florescence maximum).  $P_m^B$ = the chlorophyll standardized maximum carbon uptake ( $g\ C\ g^{-1}\ Chl\ h^{-1}$ ).  $\alpha_B$ = the light utilization efficiency value standardized for chlorophyll ( $g\ C\ g^{-1}\ Chl\ mol^{-1}\ photons\ m^2$ ).  $I_k$ - values ( $P_m^B / \alpha_B$ ) = the light level that is saturating for carbon fixation ( $\mu mol\ photons\ m^{-2}\ s^{-1}$ ).

| Date             | Julian Day | Depth (m) | $P_m^B$ | $\alpha_B$ | $I_k (P_m^B / \alpha_B)$ |
|------------------|------------|-----------|---------|------------|--------------------------|
| <b>Station 1</b> |            |           |         |            |                          |
| Jul-14           | 202        | 1         | 2.470   | 25.97      | 26.4                     |
| Aug-14           | 213        | 1         | 0.981   | 12.24      | 22.3                     |
| Aug-14           | 213        | 10        | 0.099   | 2.19       | 12.5                     |
| Sep-14           | 251        | 1         | 0.620   | 11.03      | 15.6                     |
| Sep-14           | 251        | 18        | 0.247   | 2.25       | 30.4                     |
| Sep-14           | 263        | 1         | 0.618   | 8.11       | 21.2                     |
| Sep-14           | 263        | 20        | 0.514   | 8.51       | 16.8                     |
| Sep-14           | 270        | 1         | 0.600   | 28.96      | 5.8                      |
| Sep-14           | 270        | 20        | 0.434   | 17.75      | 6.8                      |
| <b>Station 2</b> |            |           |         |            |                          |
| Jul-14           | 198        | 1         | 1.101   | 16.33      | 18.7                     |
| Jul-14           | 198        | 40        | 0.072   | 0.67       | 29.8                     |
| Jul-14           | 208        | 1         | 2.619   | 12.76      | 57.0                     |
| Jul-14           | 208        | 15        | 0.798   | 7.43       | 29.8                     |
| Aug-14           | 217        | 1         | 0.709   | 13.17      | 15.0                     |
| Sep-14           | 249        | 1         | 0.667   | 3.93       | 47.2                     |
| Sep-14           | 256        | 1         | 0.556   | 6.39       | 24.2                     |
| Sep-14           | 256        | 17        | 0.448   | 9.15       | 13.6                     |
| Sep-14           | 270        | 1         | 0.083   | 1.00       | 23.0                     |
| Sep-14           | 270        | 17        | 1.515   | 16.92      | 24.9                     |
| <b>Station 3</b> |            |           |         |            |                          |
| Jul-14           | 192        | 1         | 0.779   | 16.30      | 13.3                     |
| Jul-14           | 192        | 5         | 2.269   | 47.49      | 13.3                     |
| Jul-14           | 200        | 1         | 0.654   | 3.08       | 59.0                     |
| Jul-14           | 211        | 1         | 0.573   | 3.52       | 45.2                     |
| Jul-14           | 211        | 30        | 0.222   | 2.66       | 23.2                     |
| Aug-14           | 219        | 1         | 0.610   | 7.31       | 23.2                     |
| Aug-14           | 219        | 26        | 0.155   | 2.86       | 15.0                     |
| Sep-14           | 247        | 1         | 0.508   | 9.12       | 15.5                     |
| Sep-14           | 247        | 12        | 0.389   | 4.52       | 23.9                     |
| Sep-14           | 259        | 1         | 0.598   | 4.60       | 36.0                     |
| Sep-14           | 259        | 10        | 0.575   | 2.37       | 67.3                     |
| Sep-14           | 271        | 1         | 1.141   | 5.88       | 54.0                     |
| Sep-14           | 271        | 10        | 0.616   | 4.59       | 37.3                     |
| Oct-14           | 277        | 1         | 0.601   | 7.16       | 23.3                     |
| Oct-14           | 277        | 20        | 0.497   | 10.75      | 12.9                     |
| Oct-14           | 279        | 1         | 0.567   | 6.82       | 23.1                     |
| <b>Station 4</b> |            |           |         |            |                          |
| Jul-14           | 205        | 1         | 0.521   | 2.29       | 63.1                     |
| Aug-14           | 215        | 1         | 0.590   | 4.87       | 33.6                     |
| Aug-14           | 215        | 30        | 0.398   | 6.48       | 17.1                     |
| Aug-14           | 222        | 1         | 0.807   | 13.16      | 17.0                     |
| Aug-14           | 222        | 24        | 0.182   | 1.38       | 36.7                     |
| Sep-14           | 254        | 1         | 0.417   | 5.12       | 22.6                     |
| Sep-14           | 254        | 25        | 0.229   | 3.45       | 18.5                     |
| Sep-14           | 261        | 1         | 0.288   | 2.91       | 27.5                     |
| Sep-14           | 261        | 30        | 0.152   | 2.37       | 17.9                     |
| Oct-14           | 275        | 1         | 0.550   | 6.09       | 25.1                     |
| Oct-14           | 275        | 20        | 0.429   | 9.27       | 12.8                     |

**Figure S1.** Nutrient ratios at all stations and depths sampled. Nitrate + nitrite ( $\mu\text{M}$ ) versus phosphate ( $\mu\text{M}$ ) concentrations (red circles), and nitrate + nitrite ( $\mu\text{M}$ ) v. silicate ( $\mu\text{M}$ ) concentrations (blue squares). Open symbols indicate depths above the average nitracline of the data set (29m). Red and blue lines represent the 16N:1P and 15Si:16N Redfield ratios for phosphate and silicate respectively.

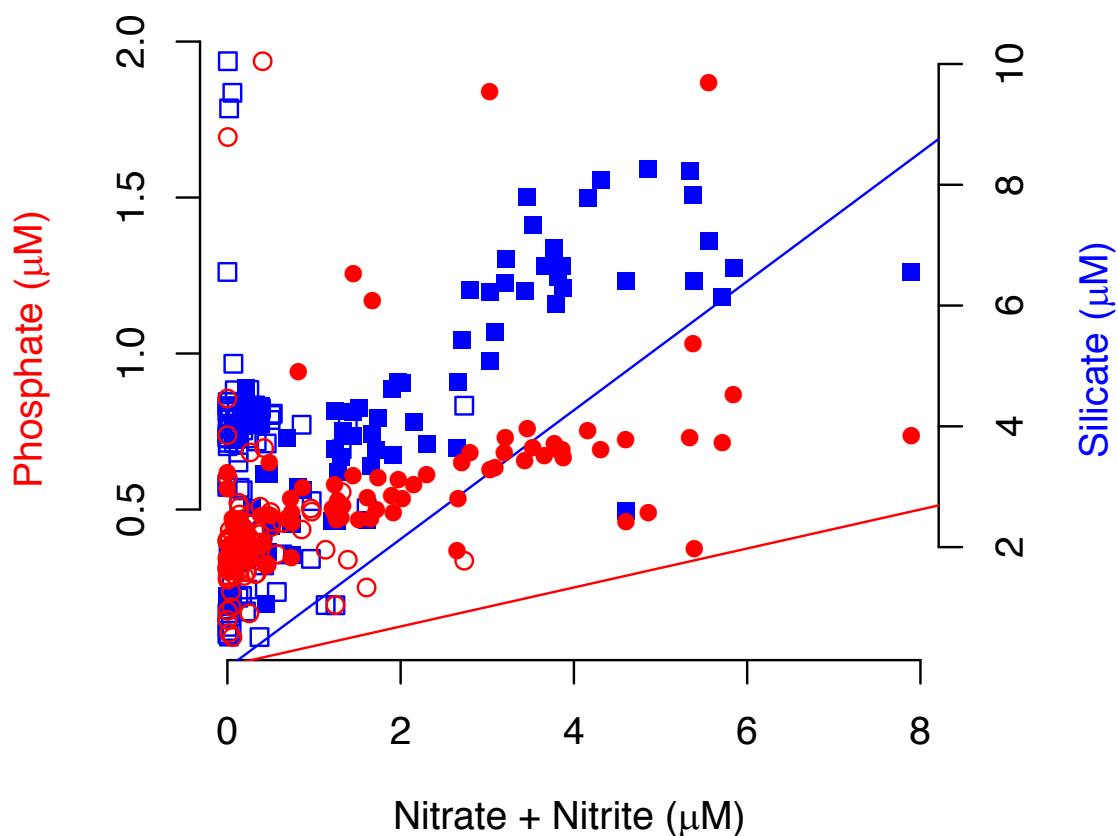

**Figure S2.** Vertical distribution of chlorophyll *a* profiles overtime for each station. Colors in legend indicate julian day for each profile.

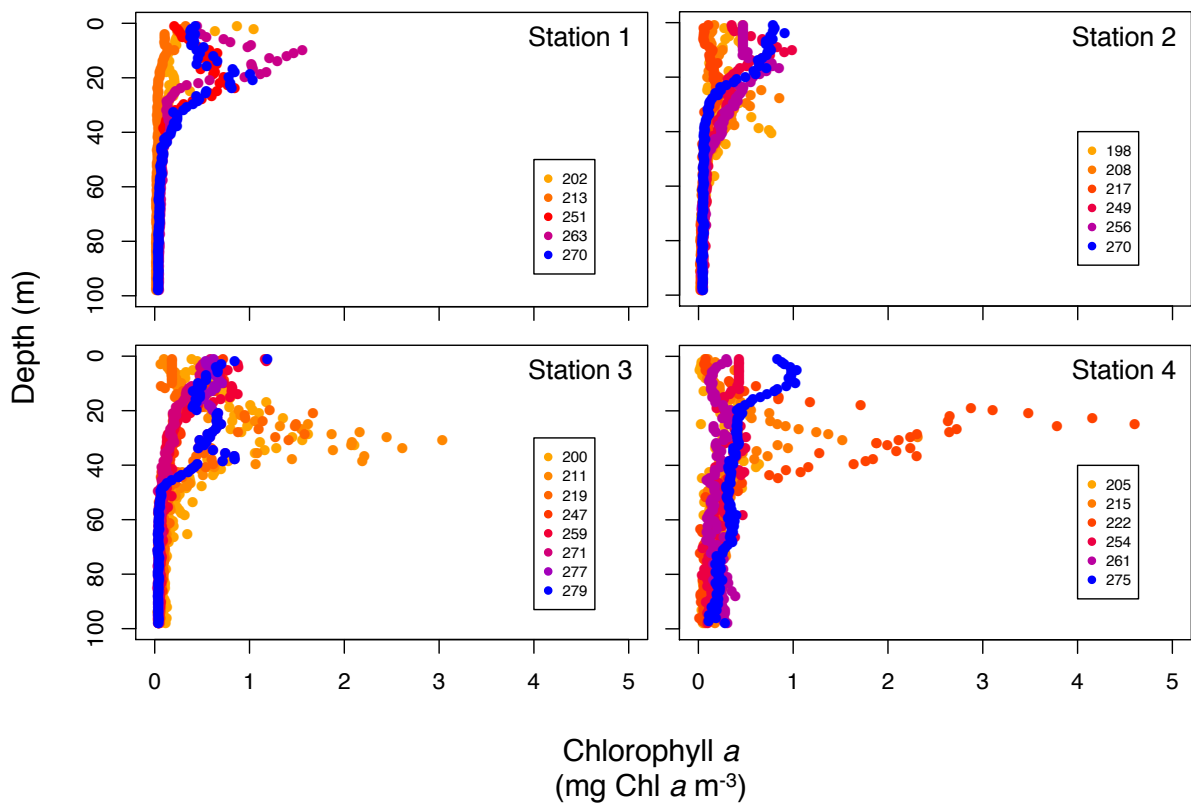

**Figure S3.** Vertical distribution of primary production profiles overtime for each station. Colors in legend indicate julian day for each profile.

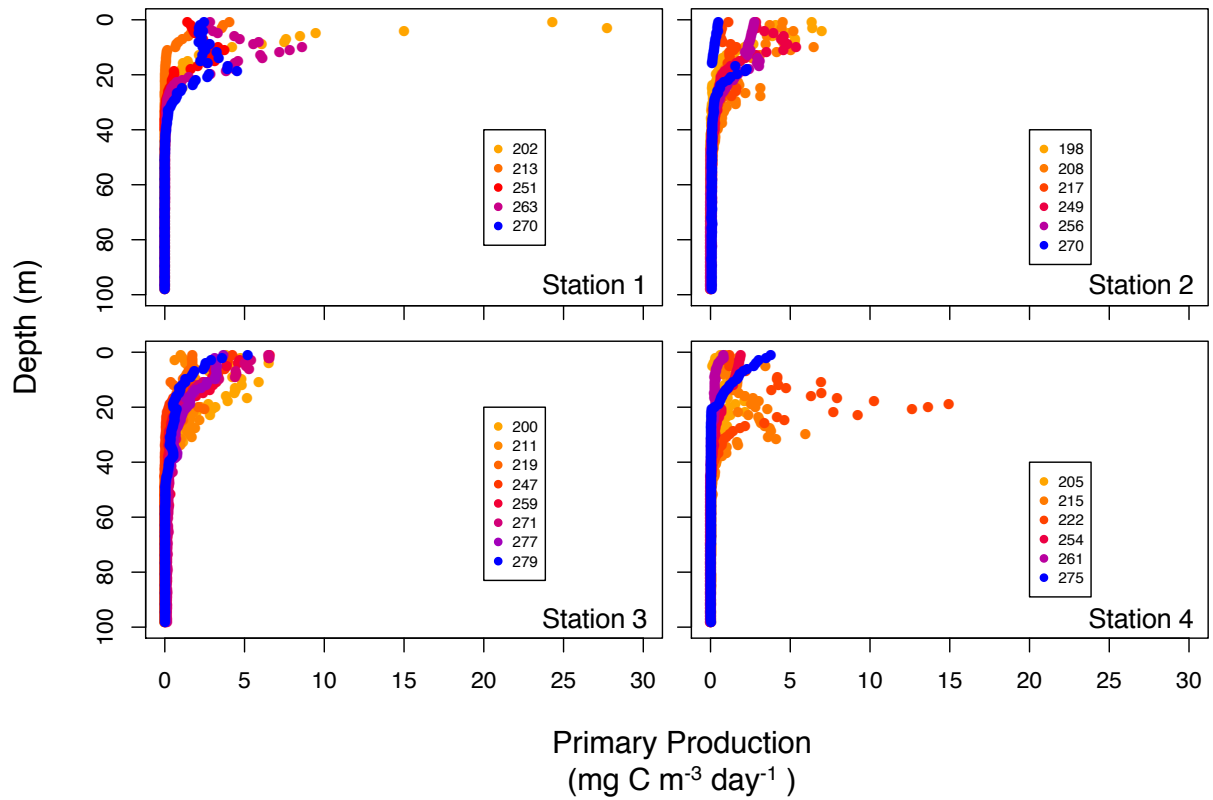

Supplement: Supplementary file 1 [file bg-16-3777-2019-supplement.pdf]
